# Supplementary figures and images for: Phosphorylation-dependent conformational changes of arrestin in the rhodopsin–arrestin complex
Source: Royal Society of Chemistry journal article supplement (doi:10.1039/d0cp00473a), 2020-01-01

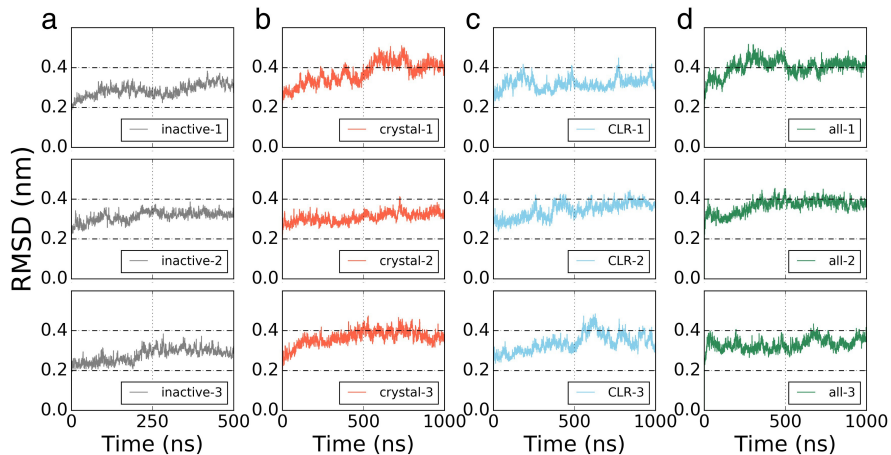

Supplement: d0cp00473a3.pdf [file d0cp00473a3.pdf]

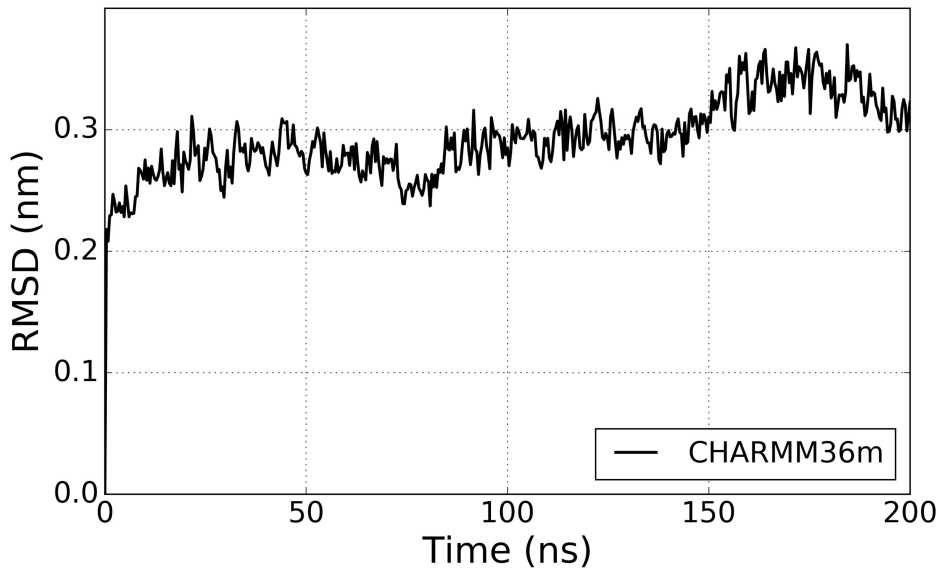

Supplement: d0cp00473a4.pdf [file d0cp00473a4.pdf]

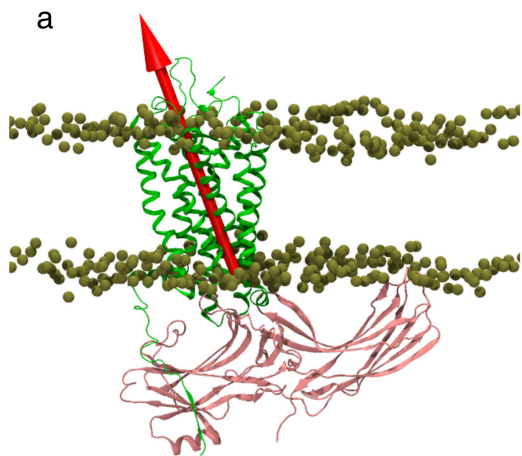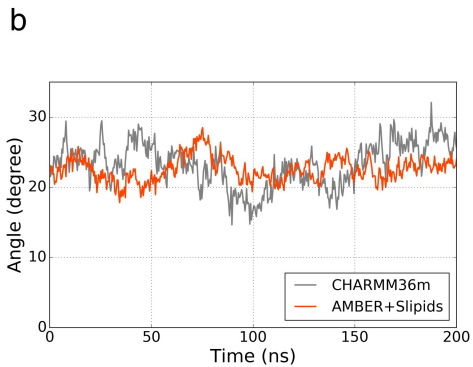

Supplement: d0cp00473a5.pdf [file d0cp00473a5.pdf]
